# Supplementary material for: Particle and front tracking in experimental and computational avalanche dynamics
Source: Copernicus journal article supplement (doi:10.5194/nhess-25-4185-2025), 2025-10-28
Supplement: Supplementary file [file nhess-25-4185-2025-supplement-title-page.pdf › nhess-25-4185-2025-supplement-title-page.pdf]

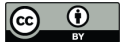

## *Supplement of*

# **Particle and front tracking in experimental and computational avalanche dynamics**

**Michael Neuhauser et al.**

*Correspondence to:* Jan-Thomas Fischer ([jt.fischer@bfw.gv.at](mailto:jt.fischer@bfw.gv.at))

- nhess-25-4185-2025-supplement-title-page.pdf
- Inputs\_simulation
  - Inputs
    - \* LINES
    - \* Nordkette.asc
    - \* POINTS
    - \* REL
  - README\_simulations.txt
  - bestFitFront.ini
  - bestFitParticle.ini
  - local\_distanceTimeAnalysisCfg.ini

The copyright of individual parts of the supplement might differ from the article licence.
